# Supplementary material for: Targeting ATAD3A-PINK1-mitophagy axis overcomes chemoimmunotherapy resistance by redirecting PD-L1 to mitochondria
Source: PubMed Central journal article supplement (PMC9977947; doi:10.1038/s41422-022-00766-z), 2023-01-10
Supplement: 41422_2022_766_MOESM1_ESM.pdf [file 41422_2022_766_MOESM1_ESM.pdf]

**Fig. S1**

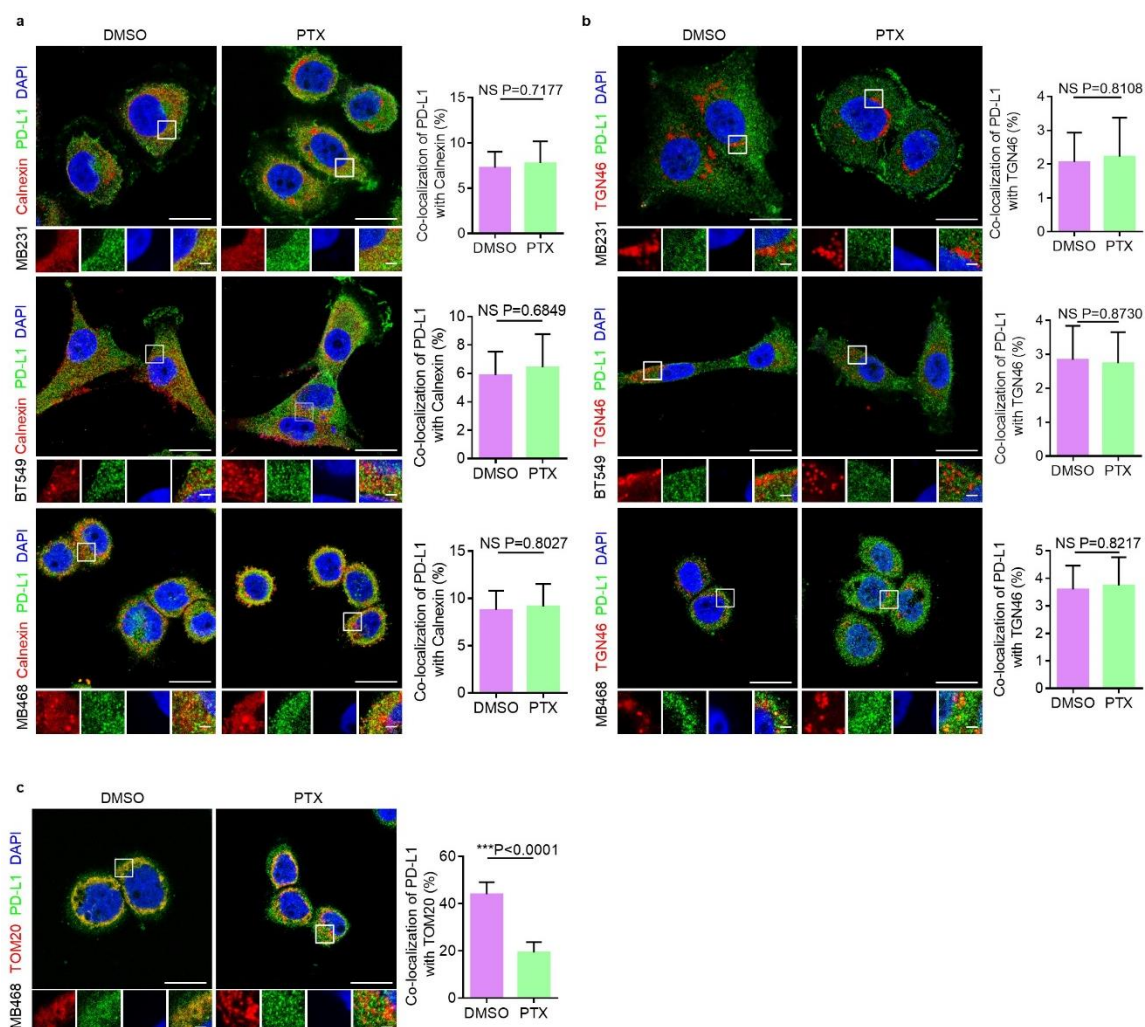

**Fig. S1 The effect of paclitaxel on subcellular localization of PD-L1.**

**a** Left, immunostaining of PD-L1 (green) and Calnexin-labeled endoplasmic reticulum (red) in TNBC cells with or without 20 nM paclitaxel treatment for 12 h in TNBC cells. Scale bars, 20  $\mu$ m and 2  $\mu$ m (inset). Right, the percentage of PD-L1 co-localized with Calnexin ( $n = 5$  fields,  $t$ -test). **b** Left, immunostaining of PD-L1 (green) and TGN46-labeled Golgi complex (red) with or without 20 nM paclitaxel treatment for 12 h in TNBC cells. Scale bars, 20  $\mu$ m and 2  $\mu$ m (inset). Right, the percentage of PD-L1 co-localized with TGN46 ( $n = 5$  fields,  $t$ -test). **c** Left, immunostaining of PD-L1 (green) and TOM20-labeled mitochondria (red) with or without 20 nM paclitaxel treatment for 12 h in MDA-MB-468 cells. Scale bars, 20

$\mu\text{m}$  and  $2 \mu\text{m}$  (inset). Right, the percentage of PD-L1 co-localized with TOM20 ( $n = 5$  fields,  $t$ -test). Data are representative of at least two independent experiments and are shown as means  $\pm$  SD.
