# Supplementary material for: Targeting ATAD3A-PINK1-mitophagy axis overcomes chemoimmunotherapy resistance by redirecting PD-L1 to mitochondria
Source: PubMed Central journal article supplement (PMC9977947; doi:10.1038/s41422-022-00766-z), 2023-01-10
Supplement: 41422_2022_766_MOESM2_ESM.pdf [file 41422_2022_766_MOESM2_ESM.pdf]

1 **Fig. S2**

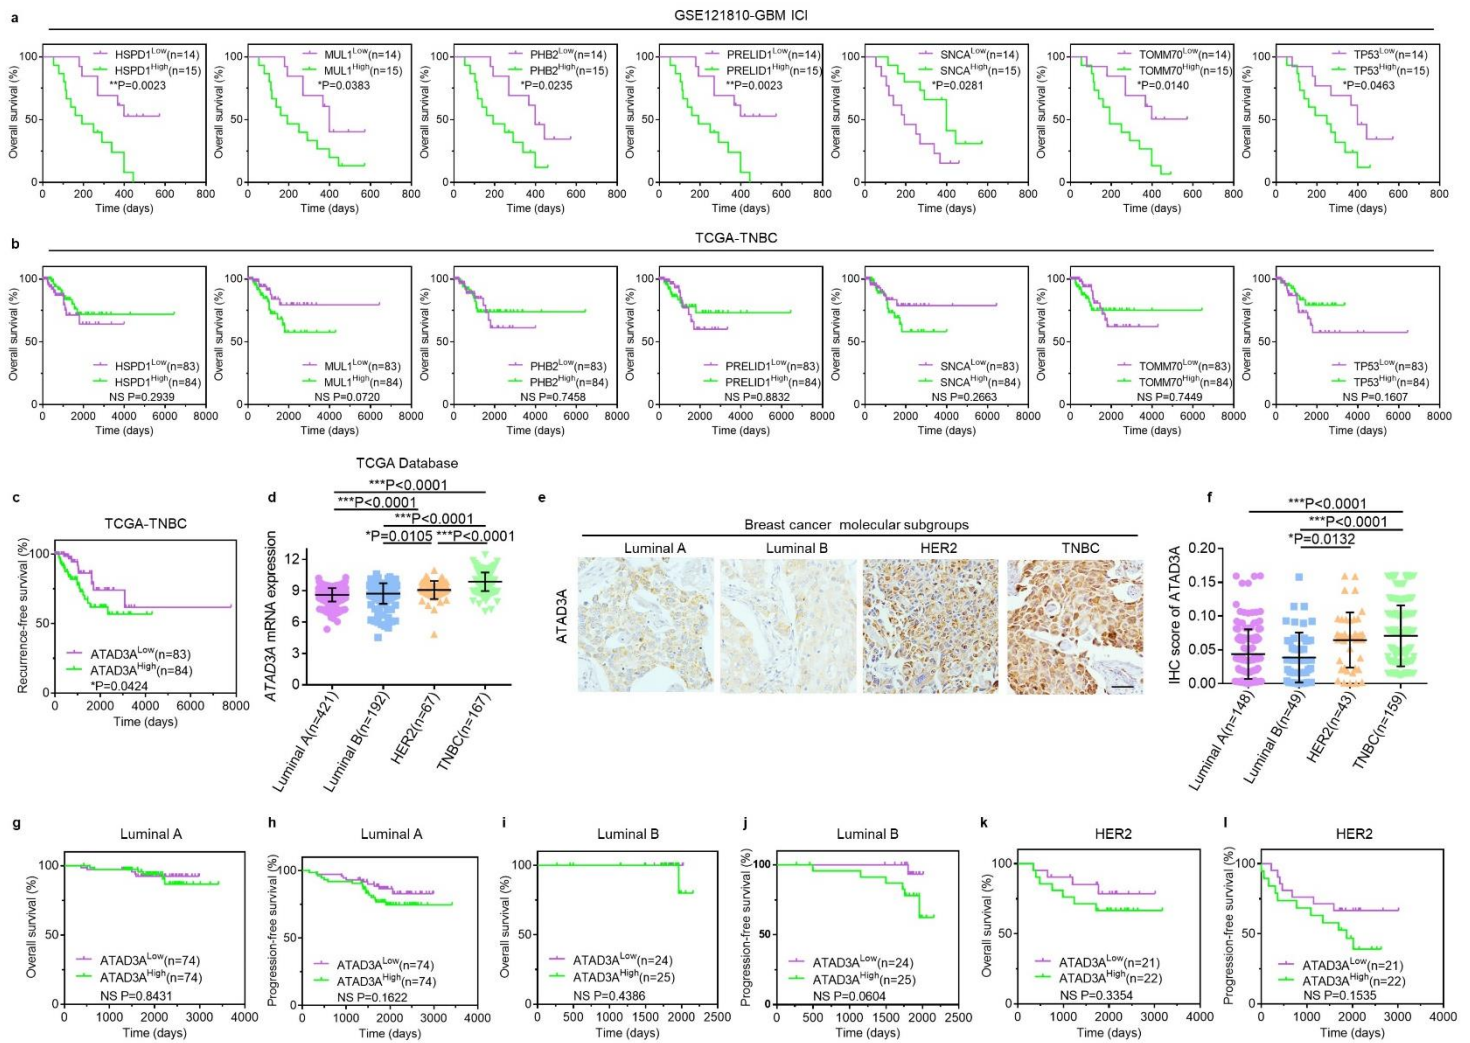

2 **Fig. S2 The expression of ATAD3A and other candidate genes in the**

3 **immunotherapy cohort and breast cancer cohort.**

4 **a** Kaplan-Meier analysis of the overall survival of glioblastoma patients who received

5 anti-PD-1 antibody treatment with high or low mRNA expression of candidate genes

6 in tumors ( $n = 29$ ). Data were derived from GSE121810 cohort. Cutoff of candidate

7 gene expression was determined by the median (Kaplan-Meier method and log-rank

8 test). **b** Kaplan-Meier analysis of the overall survival of TNBC patients with high or

9 low level of candidate genes. Data were derived from TCGA database. Cutoff was

10 determined by the median (Kaplan-Meier method and log-rank test). **c** Kaplan-Meier  
11 analysis of the recurrence-free survival of TNBC patients with high or low ATAD3A  
12 expression. Data were derived from TCGA database. Cutoff was determined by the  
13 median (Kaplan-Meier method and log-rank test). **d** Quantification of ATAD3A  
14 mRNA in luminal A ( $n = 421$ ), luminal B ( $n = 192$ ), HER2-overexpressing ( $n = 67$ )  
15 and TNBC ( $n = 167$ ). Data were derived from TCGA database (one-way ANOVA). **e**,  
16 **f** Representative images (**e**) and quantification (**f**) of ATAD3A staining in tumor area  
17 on serial sections from luminal A ( $n = 148$ ), luminal B ( $n = 49$ ), HER2 ( $n = 43$ ) and  
18 TNBC ( $n = 159$ ). The data were derived from 399 breast cancer patients in the  
19 multicentric clinical cohort of this study (one-way ANOVA). These patients  
20 underwent radical mastectomy or modified mastectomy and received the standard  
21 chemotherapy. Scale bars, 50  $\mu\text{m}$ . **g**, **h** Kaplan-Meier analysis of the overall survival  
22 (**g**) and progression-free survival (**h**) of luminal A breast cancer patients with high or  
23 low ATAD3A expression. Cutoff of ATAD3A expression was determined by the  
24 median (Kaplan-Meier method and log-rank test). **i**, **j** Kaplan-Meier analysis of the  
25 overall survival (**i**) and progression-free survival (**j**) of luminal B breast cancer  
26 patients with high or low ATAD3A expression (Kaplan-Meier method and log-rank  
27 test). **k**, **l** Kaplan-Meier analysis of the overall survival (**k**) and progression-free  
28 survival (**l**) of patients with HER2-overexpressing breast cancer with high or low  
29 ATAD3A expression (Kaplan-Meier method and log-rank test).
