# Supplementary material for: Targeting ATAD3A-PINK1-mitophagy axis overcomes chemoimmunotherapy resistance by redirecting PD-L1 to mitochondria
Source: PubMed Central journal article supplement (PMC9977947; doi:10.1038/s41422-022-00766-z), 2023-01-10
Supplement: 41422_2022_766_MOESM4_ESM.pdf [file 41422_2022_766_MOESM4_ESM.pdf]

**Fig. S4**

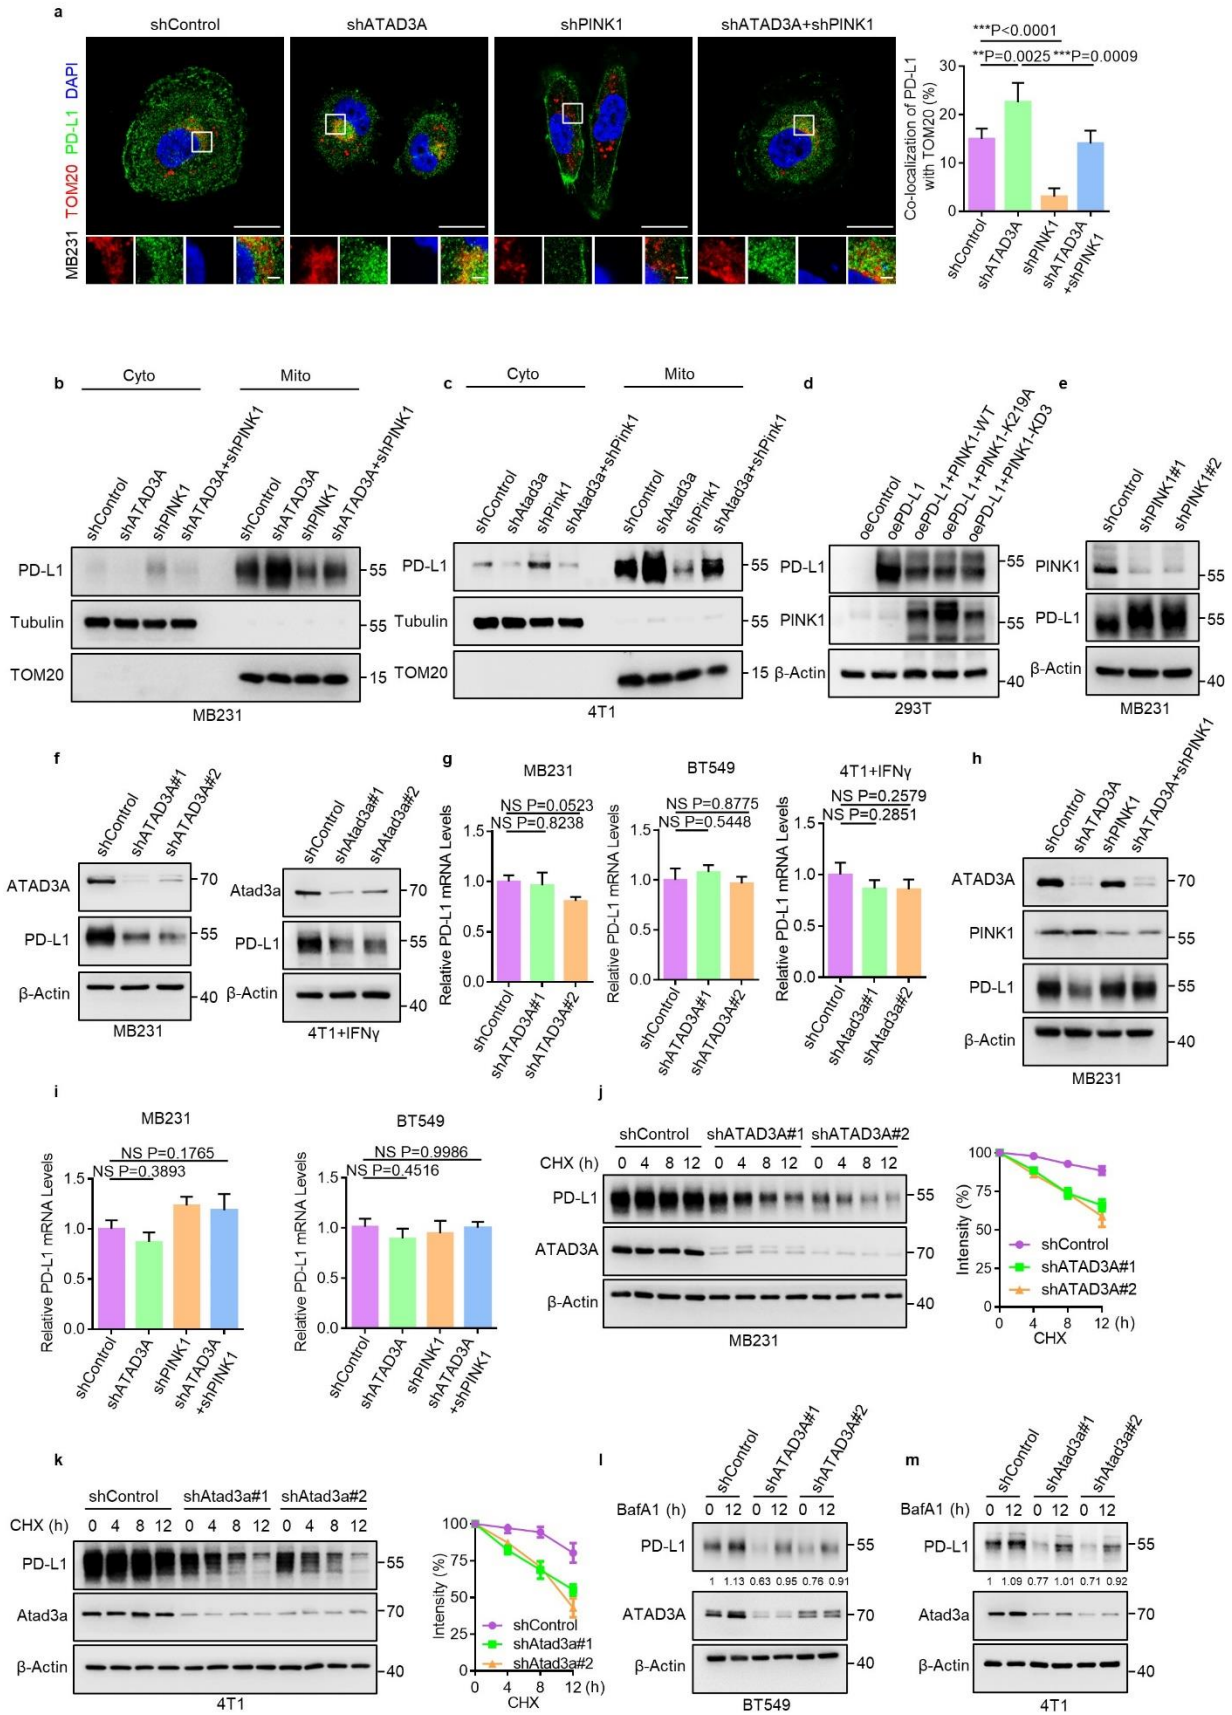

**Fig. S4 ATAD3A-PINK1 mitophagy axis plays a crucial role in regulating PD-L1 degradation.**

**a** Left, immunostaining of PD-L1 (green) and TOM20 (red) in control, ATAD3A-knockdown, PINK1-knockdown or ATAD3A and PINK1 double knockdown MDA-MB-231 cells. Scale bars, 20  $\mu\text{m}$  and 2  $\mu\text{m}$  (inset). Right, the percentage of PD-L1 colocalized with TOM20 ( $n = 5$  fields, one-way ANOVA). **b, c** Immunoblot of PD-L1 in the cytoplasm and mitochondria of control, ATAD3A-knockdown, PINK1-knockdown or ATAD3A and PINK1 double knockdown MDA-MB-231 cells (**b**) and 4T1 cells (**c**). TOM20 and Tubulin were used as mitochondria and cytoplasm protein controls. Cyto, cytoplasm, mito, mitochondria. **d** Immunoblot of indicated proteins in PD-L1 transfected HEK293T cells with overexpression of wild-type PINK1 or kinase-dead PINK1 (K219A mutant or K219A, D362A and D384A triple kinase-dead mutant). **e** Immunoblot of PD-L1 in control and PINK1-knockdown (shPINK1#1 and shPINK1#2) MDA-MB-231 cells. **f** Immunoblot of PD-L1 in MDA-MB-231 cells (left) and 4T1 cells (right) with or without ATAD3A-knockdown. 4T1 cells were treated with 500 IU/mL IFN $\gamma$  for 24 h. **g** qRT-PCR of PD-L1 mRNA in control, ATAD3A-knockdown MDA-MB-231 cells, BT549 cells and 4T1 cells. 4T1 cells were treated with 500 IU/mL IFN $\gamma$  for 24 h ( $n = 3$ , one-way ANOVA). **h** Immunoblot of total PD-L1 in control, ATAD3A-knockdown, PINK1-knockdown or ATAD3A and PINK1 double knockdown MDA-MB-231 cells. **i** qRT-PCR of PD-L1 mRNA in control, ATAD3A-knockdown, PINK1-knockdown or ATAD3A and PINK1 double knockdown MDA-MB-231 cells and BT549 cells. **j, k** Left, immunoblot of PD-L1 in

control and ATAD3A-knockdown MDA-MB-231 cells (**j**) and 4T1 cells (**k**) treated with 20  $\mu$ M cycloheximide (CHX) for indicated times. h, hours. Right, quantification of PD-L1 intensity detected in immunoblot. **l, m** Immunoblot of PD-L1 in control and ATAD3A-knockdown BT549 cells (**l**) and 4T1 cells (**m**) treated with 20 nM bafilomycin A1 (BafA1) for 12 h. Data are representative of at least two independent experiments and are shown as means  $\pm$  SD.
