# Supplementary material for: Targeting ATAD3A-PINK1-mitophagy axis overcomes chemoimmunotherapy resistance by redirecting PD-L1 to mitochondria
Source: PubMed Central journal article supplement (PMC9977947; doi:10.1038/s41422-022-00766-z), 2023-01-10
Supplement: 41422_2022_766_MOESM6_ESM.pdf [file 41422_2022_766_MOESM6_ESM.pdf]

**Fig. S6**

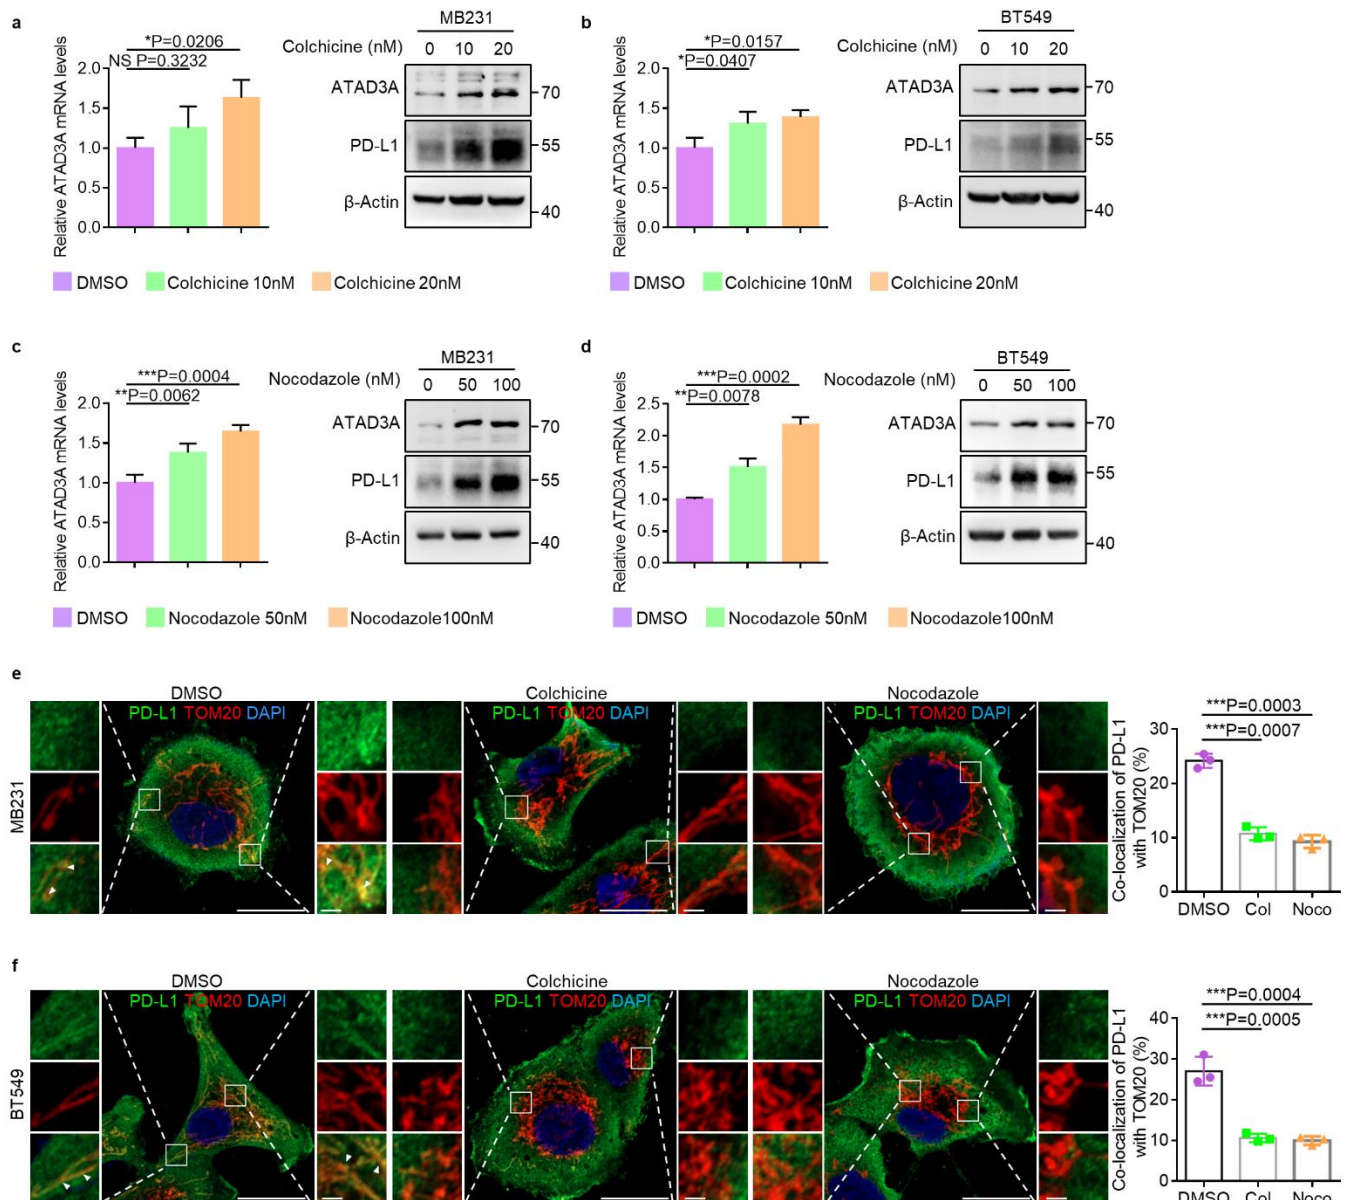

**Fig. S6 Colchicine and nocodazole upregulate ATAD3A to reduce the mitochondrial localization of PD-L1.**

**a, b** Left, qRT-PCR of ATAD3A mRNA in MDA-MB-231 cells (**a**) and BT549 cells (**b**) in the presence of colchicine (10 nM or 20 nM) for 24 h ( $n = 3$ , one-way ANOVA). Right, immunoblot of ATAD3A and PD-L1 in MDA-MB-231 cells (**a**) and BT549 cells (**b**) incubated with colchicine for 24 h. **c, d** Left, qRT-PCR of ATAD3A

mRNA in MDA-MB-231 cells (**c**) and BT549 cells (**d**) in the presence of nocodazole (50 nM or 100 nM) for 24 h. Right, immunoblot of ATAD3A and PD-L1 in MDA-MB-231 cells (**e**) and BT549 cells (**d**) incubated with nocodazole for 24 h. **e, f** Left, co-localization of PD-L1 (green) and TOM20 (red) with or without colchicine (10 nM), nocodazole (100 nM) treatment for 24 h in MDA-MB-231 cells (**e**) and BT549 cells (**f**). Arrowheads, co-localization. Scale bars, 20  $\mu\text{m}$  and 2  $\mu\text{m}$  (inset). Right, the percentage of PD-L1 co-localized with TOM20 ( $n = 3$  fields,  $t$ -test). Data are representative of at least two independent experiments and are shown as means  $\pm$ SD.
