# Supplementary material for: Targeting ATAD3A-PINK1-mitophagy axis overcomes chemoimmunotherapy resistance by redirecting PD-L1 to mitochondria
Source: PubMed Central journal article supplement (PMC9977947; doi:10.1038/s41422-022-00766-z), 2023-01-10
Supplement: 41422_2022_766_MOESM7_ESM.pdf [file 41422_2022_766_MOESM7_ESM.pdf]

**Fig. S7**

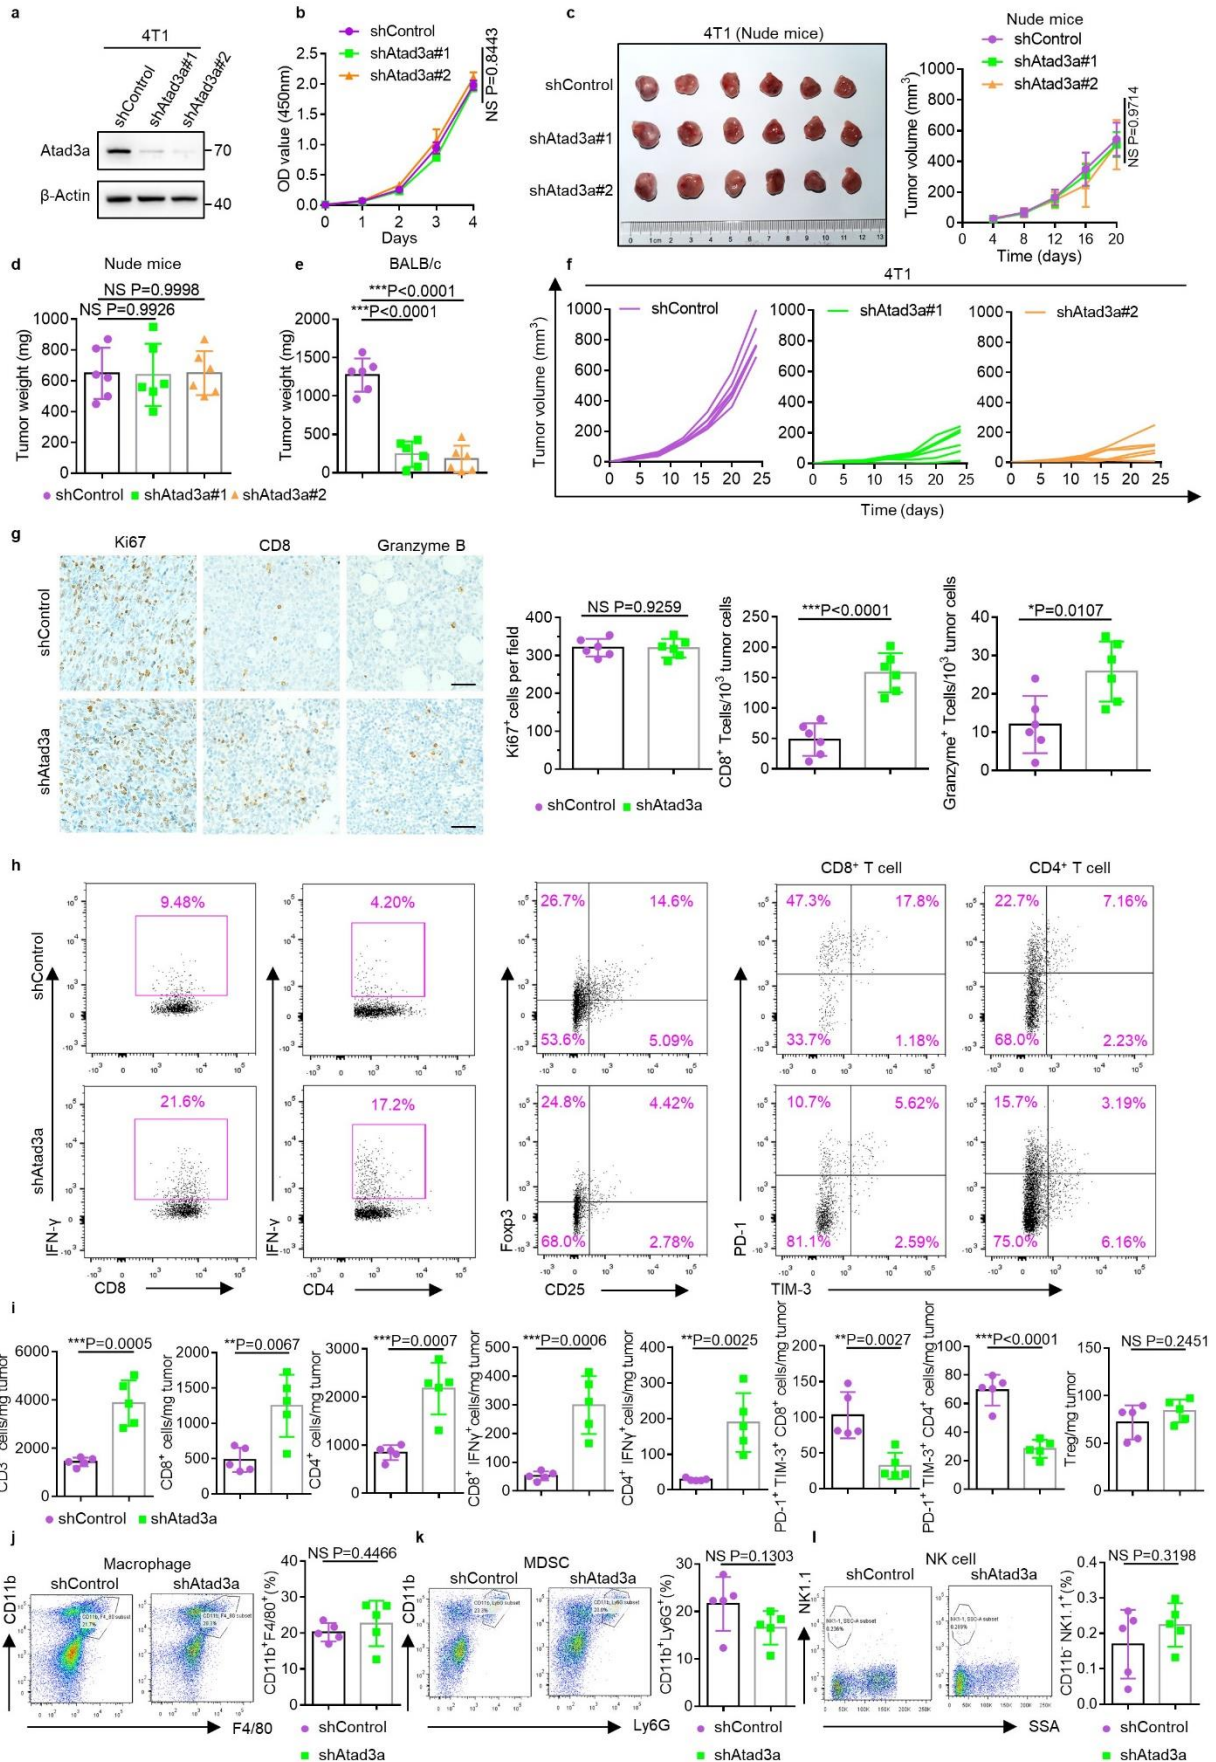

**Fig. S7 Depletion of Atad3a in tumor cells suppresses tumor growth in vivo by facilitating anti-tumor immune response.**

**a** 4T1 mouse breast cancer cells were transfected with control shRNA (shControl) or shRNA for Atad3a (shAtad3a#1 and shAtad3a#2). Immunoblot of Atad3a in 4T1 cells. **b** Proliferation of control and Atad3a-knockdown 4T1 cells measured by CCK-8 (Cell Counting Kit-8) assay ( $n = 5$ , one-way ANOVA). **c** BALB/c nude mice were inoculated orthotopically with  $1 \times 10^5$  4T1 cells transfected with control shRNA (shControl) or shRNA for Atad3a (shAtad3a#1 and shAtad3a#2). The endpoint images (left) and volume (right) of tumors formed by control and Atad3a-knockdown cells in BALB/c nude mice ( $n = 6$ , one-way ANOVA). **d** The weight of 4T1 tumors formed by control and Atad3a-knockdown cells in nude mice at the end point ( $n = 6$ , one-way ANOVA). **e–l** BALB/c mice were inoculated orthotopically with control or Atad3a-knockdown 4T1 tumor cells. **e, f** The weight at the end point (**e**) and growth curves (**f**) of tumors formed by control and Atad3a-knockdown cells ( $n = 6$ , one-way ANOVA). **g** Left, IHC staining of Ki67, CD8 and granzyme B on serial sections of the tumors formed by control and Atad3a-knockdown cells. Right, quantification of the numbers of Ki67<sup>+</sup> tumor cells, tumor-infiltrating CD8<sup>+</sup> T cells and granzyme B secreting cells ( $n = 6$ , *t*-test). **h** Flow cytometry of tumor-infiltrating IFN $\gamma$ <sup>+</sup>CD8<sup>+</sup>, IFN $\gamma$ <sup>+</sup>CD4<sup>+</sup>, CD4<sup>+</sup>CD25<sup>+</sup>Foxp3<sup>+</sup>, PD-1<sup>+</sup>TIM-3<sup>+</sup>CD8<sup>+</sup> and PD-1<sup>+</sup>TIM-3<sup>+</sup>CD4<sup>+</sup> T cells in tumors formed by control and Atad3a-knockdown 4T1 cells. **i** Quantification of the numbers of tumor-infiltrating CD3<sup>+</sup>, CD8<sup>+</sup>, CD4<sup>+</sup>, IFN $\gamma$ <sup>+</sup>CD8<sup>+</sup>, IFN $\gamma$ <sup>+</sup>CD4<sup>+</sup>, PD-1<sup>+</sup>TIM-3<sup>+</sup>CD8<sup>+</sup>, PD-1<sup>+</sup>TIM-3<sup>+</sup>CD4<sup>+</sup> T cells and CD4<sup>+</sup>CD25<sup>+</sup>Foxp3<sup>+</sup> T<sub>reg</sub> cells per

milligram of tumor tissue in control and Atad3a-knockdown 4T1 tumors by flow cytometry ( $n = 5$ ,  $t$ -test). **j–l** Flow cytometry (left) and quantification (right) of the percentages of tumor-infiltrating macrophages (**j**), myeloid-derived suppressor cells (MDSCs) (**k**) and natural killer cells (NKs) (**l**) in 4T1 tumors formed by control and Atad3a-knockdown cells in BALB/c mice ( $n = 5$ ,  $t$ -test). Data are representative of two independent experiments and were shown as means  $\pm$  SD.
