# Supplementary material for: Targeting ATAD3A-PINK1-mitophagy axis overcomes chemoimmunotherapy resistance by redirecting PD-L1 to mitochondria
Source: PubMed Central journal article supplement (PMC9977947; doi:10.1038/s41422-022-00766-z), 2023-01-10
Supplement: 41422_2022_766_MOESM8_ESM.pdf [file 41422_2022_766_MOESM8_ESM.pdf]

**Fig. S8**

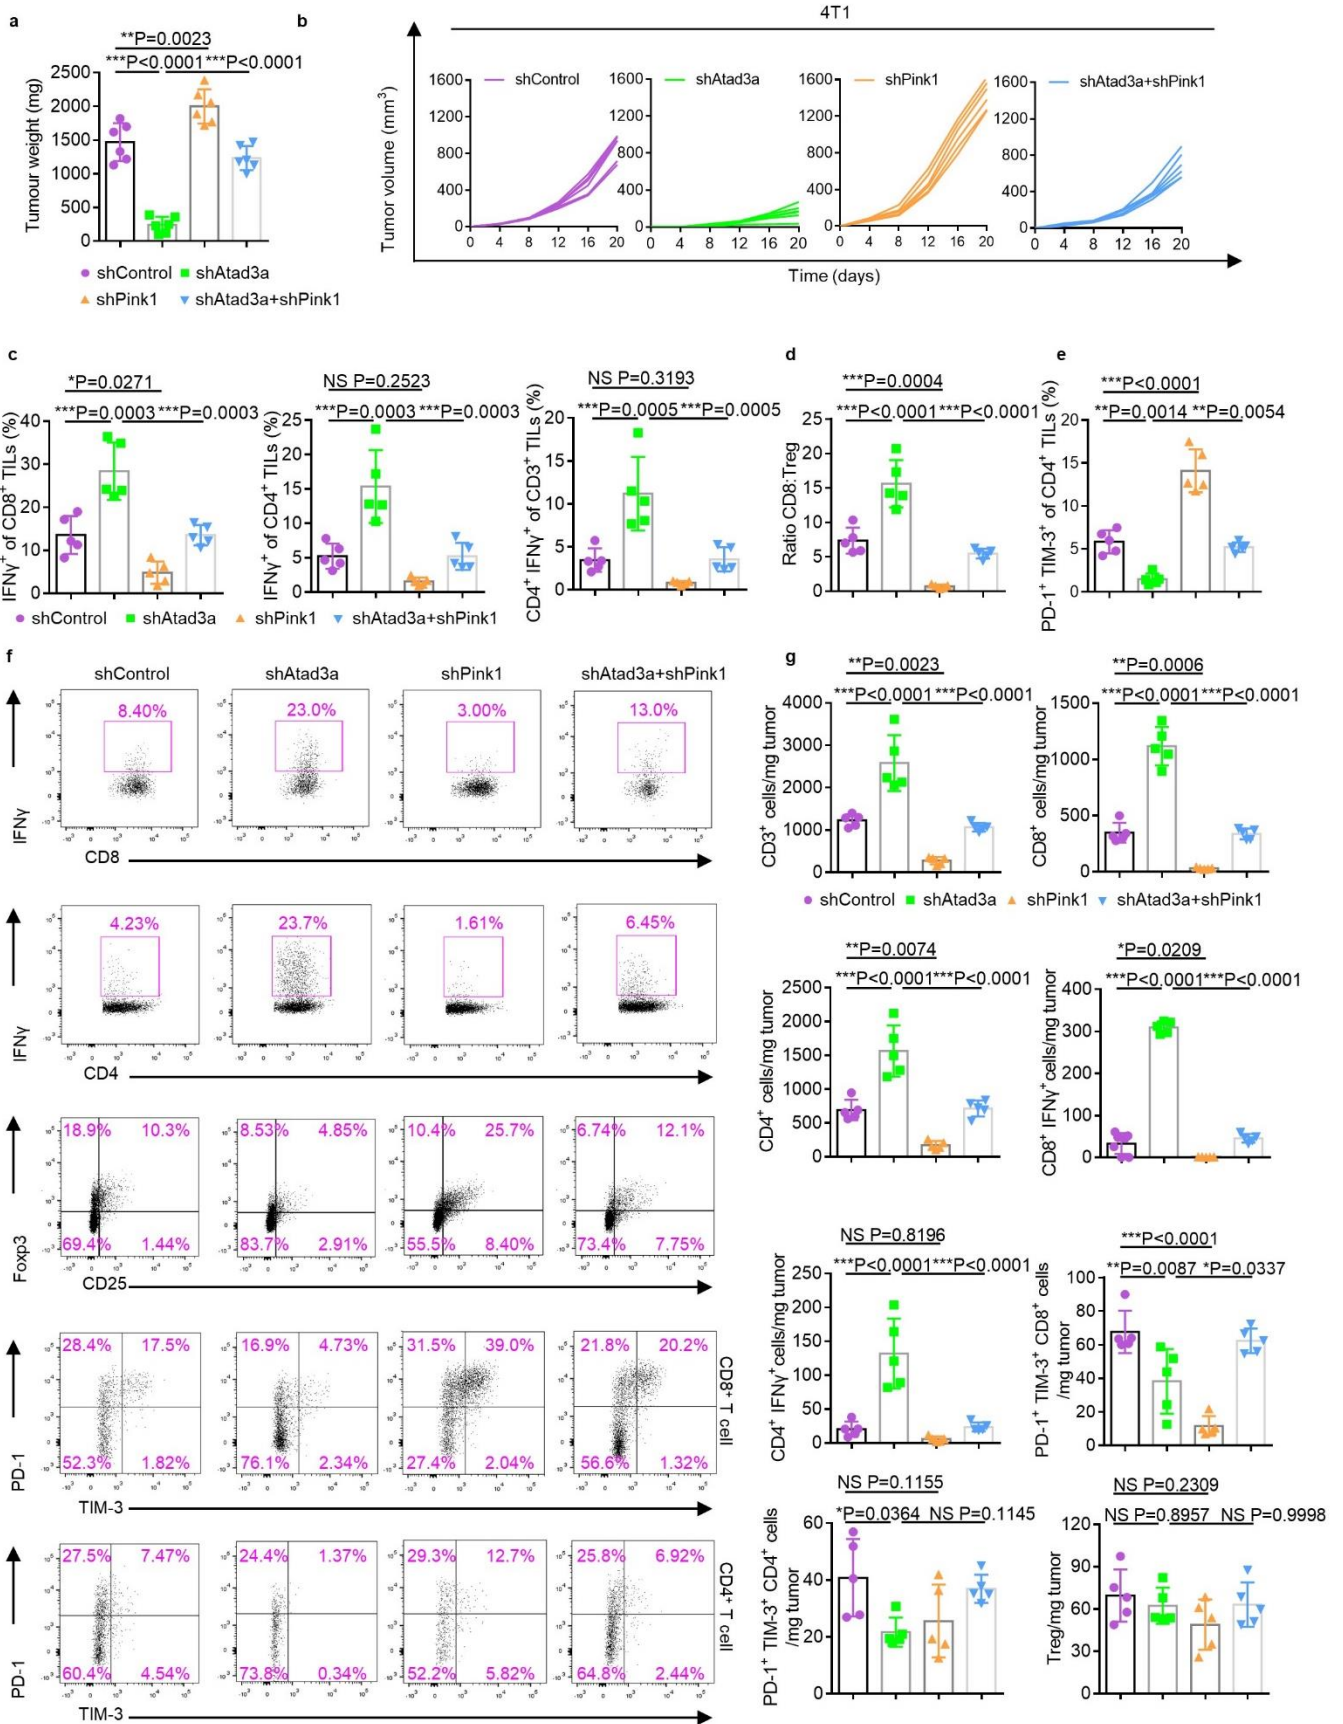

**Fig. S8 ATAD3A-PINK1 mitophagy axis participates in regulating T-cell anti-tumor immune response in vivo.**

**a–d** BALB/c mice were inoculated orthotopically with 4T1 cells with control, Atad3a-knockdown, Pink1-knockdown or Atad3a and Pink1 double knockdown. **a** The weight of 4T1 tumors ( $n = 6$ , one-way ANOVA). **b** The growth curves of 4T1 tumors. **c** Quantification of the percentages of tumor-infiltrating IFN $\gamma$ <sup>+</sup>CD8<sup>+</sup> T cells and IFN $\gamma$ <sup>+</sup>CD4<sup>+</sup> T cells by flow cytometry ( $n = 5$ , one-way ANOVA). **d** Ratio of CD8<sup>+</sup> cytotoxic T lymphocytes (CTLs) to CD4<sup>+</sup>CD25<sup>+</sup>Foxp3<sup>+</sup> T<sub>reg</sub> cells ( $n = 5$ , one-way ANOVA). **e** Quantification of the percentage of PD-1<sup>+</sup>TIM-3<sup>+</sup>CD4<sup>+</sup> T cells by flow cytometry ( $n = 5$ , one-way ANOVA). **f** Flow cytometry of tumor-infiltrating IFN $\gamma$ <sup>+</sup>CD8<sup>+</sup>, IFN $\gamma$ <sup>+</sup>CD4<sup>+</sup>, CD4<sup>+</sup>CD25<sup>+</sup>Foxp3<sup>+</sup>, PD-1<sup>+</sup>TIM-3<sup>+</sup>CD8<sup>+</sup> and PD-1<sup>+</sup>TIM-3<sup>+</sup>CD4<sup>+</sup> T cells in tumors formed by control, Atad3a-knockdown, Pink1-knockdown or Atad3a and Pink1 double knockdown cells. **g** Quantification of the numbers of tumor-infiltrating CD3<sup>+</sup>, CD8<sup>+</sup>, CD4<sup>+</sup>, IFN $\gamma$ <sup>+</sup>CD8<sup>+</sup>, IFN $\gamma$ <sup>+</sup>CD4<sup>+</sup>, PD-1<sup>+</sup>TIM-3<sup>+</sup>CD8<sup>+</sup>, PD-1<sup>+</sup>TIM-3<sup>+</sup>CD4<sup>+</sup> T cells and CD4<sup>+</sup>CD25<sup>+</sup>Foxp3<sup>+</sup> T<sub>reg</sub> cells per milligram of tumor tissue by flow cytometry ( $n = 5$ , one-way ANOVA). Data are representative of two independent experiments and are shown as means  $\pm$  SD.
